# Supplementary material
Source: PubMed Central journal article supplement (PMC6450287)
Supplement: jamapediatr-173-352-s001.pdf [file jamapediatr-173-352-s001.pdf]

## Supplementary Online Content

Tan B, Wong JJ-M, Sultana R, et al. Global case fatality trends in pediatric severe sepsis and septic shock: a systematic review and meta-analysis. *JAMA Pediatr*. Published online February 11, 2019. doi:10.1001/jamapediatrics.2018.4839

**eTable 1.** Search strategies for databases

**eTable 2.** Characteristics of included studies conducted in developed countries

**eTable 3.** Characteristics of included studies conducted in developing countries

**eTable 4.** Risk of bias of individual randomized clinical trials

**eTable 5.** Risk of bias of individual observational studies

**eFigure 1.** Cumulative forest plot of case fatality rates from studies conducted in developed countries

**eFigure 2.** Cumulative forest plot of case fatality rates from studies conducted in developing countries

**eFigure 3.** Forest plot of case fatality rates from randomized clinical trials

**eFigure 4.** Forest plot of case fatality rates from observational studies

**eFigure 5.** Forest plot of case fatality rates from studies with severe sepsis populations

**eFigure 6.** Forest plot of case fatality rates from studies with septic shock populations

**eFigure 7.** Forest plot of case fatality rates from high-quality studies with low risk of bias

**eFigure 8.** Time-trend of pooled weighted mortality rates from 1982 to 2016 (by year of study) for high-quality studies with low risk of bias

**eReferences.**

This supplementary material has been provided by the authors to give readers additional information about their work.

**eTable 1.** Search strategies for databases

| Database         | Search Strategies                                                                                                                                                                                                                                                                                                                                                                                                                                                                                               | Results obtained as of 10 <sup>th</sup> January 2017 |
|------------------|-----------------------------------------------------------------------------------------------------------------------------------------------------------------------------------------------------------------------------------------------------------------------------------------------------------------------------------------------------------------------------------------------------------------------------------------------------------------------------------------------------------------|------------------------------------------------------|
| PubMed           | Search ((“infant”[MeSH Terms] OR “child”[MeSH Terms] OR “adolescent”[MeSH Terms] OR “Intensive Care Units, Pediatric”[Mesh] OR “Pediatrics”[Mesh] OR “Hospitals, Pediatric”[Mesh]) AND (“mortality”[Subheading] OR “Mortality”[Mesh] OR “Hospital Mortality”[Mesh]) AND (“Systemic Inflammatory Response Syndrome”[Mesh] OR “Sepsis”[Mesh] OR “Shock, Septic”[Mesh] OR “severe sepsis”[All Fields])) Filters: Child: birth-18 years                                                                             | 4279                                                 |
| Web of Science   | ((“septic shock” NEAR (child OR children OR pediatric* OR paediatric*)) OR (“severe sepsis” NEAR (child OR children OR pediatric* OR paediatric*)) OR (“systemic inflammatory response syndrome” NEAR (child OR children OR pediatric* OR paediatric*)) OR (sepsis NEAR (child OR children OR pediatric* OR paediatric*))) AND “mortality”                                                                                                                                                                      | 843                                                  |
| EMBASE           | ((‘systemic inflammatory response syndrome’/exp/mj OR ‘sepsis’/exp/mj OR ‘severe sepsis’/exp/mj OR ‘septic shock’/exp/mj) AND ‘mortality’) AND ([adolescent]/lim OR [child]/lim OR [infant]/lim OR [newborn]/lim OR [preschool]/lim OR [school]/lim)                                                                                                                                                                                                                                                            | 2787                                                 |
| CINAHL           | (MH “Sepsis+” OR MH “systemic inflammatory response syndrome+” OR MH “severe sepsis+” OR MH “septic shock+”) AND (MH “mortality+” OR MH “child mortality+”) Narrow by SubjectAge: - child, preschool: 2-5 years Narrow by SubjectAge: - infant: 1-23 months Narrow by SubjectAge: - child: 6-12 years Narrow by SubjectAge: - infant, newborn: birth-1 month Narrow by SubjectAge: - adolescent: 13-18 years Narrow by SubjectAge: - all infant Narrow by SubjectAge: - all child Search modes – Boolean/Phrase | 324                                                  |
| Cochrane CENTRAL | ([mh “systemic inflammatory response syndrome”] OR [mh “sepsis”] OR “severe sepsis” OR [mh “shock, septic”]) AND [mh “mortality”]                                                                                                                                                                                                                                                                                                                                                                               | 302                                                  |

**eTable 2.** Characteristics of included studies conducted in developed countries

| Author, Study Year                       | Description of Study                                                                         | Continent | N   | Mortality |
|------------------------------------------|----------------------------------------------------------------------------------------------|-----------|-----|-----------|
| <b>Randomised Controlled Trials</b>      |                                                                                              |           |     |           |
| Rivera, 2014 <sup>39</sup>               | Two antibiotic guidelines in patients with Rocky Mountain Spotted Fever septic shock         | NA        | 6   | 20        |
| Nadel, 2003 <sup>40</sup>                | Drotrecogin alfa vs. placebo in severe sepsis                                                | Multi     | 237 | 41        |
| Long, 2002 <sup>41</sup>                 | Plasma filtration vs. standard therapy in severe sepsis                                      | AO        | 23  | 4         |
| Levin, 2000 <sup>42</sup>                | Recombinant bactericidal/permeability-increasing protein vs. placebo in meningococcal sepsis | EU, NA    | 203 | 12        |
| Derkx, 1993 <sup>43</sup>                | HA-1A vs. placebo in meningococcal septic shock                                              | EU        | 137 | 37        |
| J5 Study Group, 1992 <sup>44</sup>       | Anti-J5 plasma vs. control plasma in severe infectious purpura                               | EU        | 33  | 12        |
| <b>Prospective Observational Studies</b> |                                                                                              |           |     |           |
| Alder, 2016 <sup>45</sup>                | Olfactomedin-4 as marker in septic shock                                                     | NA        | 45  | 6         |
| Wong, 2016 <sup>46</sup>                 | Pediatric biomarker risk model to stratify mortality risk                                    | NA        | 195 | 31        |
| Muszynski, 2014 <sup>47</sup>            | Early adaptive immune response in septic shock                                               | NA        | 22  | 2         |
| Wong, 2014 <sup>48</sup>                 | Temporal pediatric biomarker risk model in complicated shock                                 | NA        | 180 | 23        |
| Mickiewicz, 2013 <sup>49</sup>           | Metabolomics for early diagnosis of septic shock                                             | NA        | 60  | 10        |
| Weiss, 2013 <sup>6</sup>                 | Sepsis prevalence, outcomes and therapies in severe sepsis                                   | Multi     | 567 | 139       |
| Fitrolaki, 2012 <sup>50</sup>            | Heat-shock protein as marker in severe sepsis and septic shock                               | EU        | 22  | 2         |
| Wong, 2012 <sup>51</sup>                 | Pediatric sepsis biomarker risk model                                                        | NA        | 139 | 11        |
| Vila Perez, 2011 <sup>52</sup>           | Prognostic factors in pediatric sepsis                                                       | EU        | 88  | 17        |
| Wong, 2011 <sup>53</sup>                 | Gene-expression based classification for septic shock                                        | NA        | 53  | 9         |
| Bongers, 2010 <sup>54</sup>              | ADAMTS13 in severe meningococcal sepsis                                                      | EU        | 65  | 9         |
| Carcillo, 2010 <sup>55</sup>             | C-reactive protein and ferritin as marker in severe sepsis                                   | NA        | 100 | 8         |
| Deep, 2010 <sup>56</sup>                 | Hemodynamics in fluid-refractory septic shock                                                | EU        | 36  | 4         |
| Nowak, 2010 <sup>57</sup>                | Chemokine (C-C) in predicting septic shock survival                                          | NA        | 22  | 2         |
| Zurek, 2010 <sup>58</sup>                | Procalcitonin as biomarker in SIRS and sepsis                                                | EU        | 28  | 5         |
| Wheeler, 2008 <sup>59</sup>              | Neutrophil gelatinase-associated lipocalin in septic shock                                   | NA        | 90  | 11        |
| Wong, 2008 <sup>60</sup>                 | Interleukin-8 as stratification tool for septic shock intervention                           | NA        | 139 | 18        |
| Inwald, 2006 <sup>61</sup>               | Emergency management of severe sepsis                                                        | EU        | 139 | 24        |
| Wynn, 2006 <sup>62</sup>                 | Developmental age influence in septic shock                                                  | NA        | 180 | 29        |
| Michalek, 2004 <sup>63</sup>             | Bactericidal permeability increasing protein in sepsis                                       | EU        | 45  | 3         |

|                                                |                                                                                          |    |     |    |
|------------------------------------------------|------------------------------------------------------------------------------------------|----|-----|----|
| Wolfler 2004,<br>(Severe Sepsis) <sup>64</sup> | Survey of incidence of and mortality due to sepsis, severe sepsis and septic shock       | EU | 45  | 11 |
| Wolfler 2004,<br>(Septic Shock) <sup>64</sup>  | Survey of incidence of and mortality due to sepsis, severe sepsis and septic shock       | EU | 59  | 30 |
| Fisher, 2002 <sup>65</sup>                     | Clinical spectrum of shock in emergency department                                       | NA | 84  | 4  |
| Goldstein, 2002 <sup>66</sup>                  | Drotrecogin alfa in severe sepsis                                                        | NA | 187 | 25 |
| Barton, 2000 <sup>67</sup>                     | Pharmacological properties of Drotrecogin alfa in sepsis                                 | NA | 83  | 8  |
| Hatherill, 2000 <sup>68</sup>                  | Procalcitonin and cytokine levels in septic shock                                        | EU | 75  | 21 |
| Ten Have, 2000 <sup>69</sup>                   | Heart failure in meningococcal septic shock                                              | EU | 27  | 7  |
| Verhoeven, 2000 <sup>70</sup>                  | Hyperglycemia in meningococcal septic shock                                              | EU | 67  | 10 |
| Ceneviva, 1998 <sup>71</sup>                   | Hemodynamic support in fluid-refractory shock                                            | NA | 50  | 10 |
| de Groof, 1998 <sup>72</sup>                   | Growth hormone/insulin-like growth factor-I axis in meningococcal sepsis                 | EU | 27  | 8  |
| Krafte-Jacobs, 1998 <sup>73</sup>              | Increased circulating thrombomodulin in septic shock                                     | NA | 22  | 9  |
| Thiru, 1997 <sup>74</sup>                      | Myocardial cytotoxicity in meningococcal shock                                           | EU | 101 | 5  |
| Emonts, 1996 <sup>75</sup>                     | Thrombin-activatable fibrinolysis inhibitor in shock                                     | EU | 96  | 12 |
| Hatherill, 1996 <sup>76</sup>                  | Adrenal insufficiency in septic shock                                                    | EU | 33  | 11 |
| Hatherill, 1996 <sup>77</sup>                  | Gastric tonometry in septic shock                                                        | EU | 26  | 7  |
| Leteurtre, 1996 <sup>78</sup>                  | Pediatric risk of mortality and pediatric index of mortality in predicting shock outcome | EU | 58  | 16 |
| Derkx, 1992 <sup>79</sup>                      | Interleukin-10 in initial phase of meningococcal septic shock                            | EU | 25  | 4  |
| Hazelzet, 1991 <sup>80</sup>                   | Capillary leakage and inflammation in septic shock                                       | EU | 52  | 14 |
| Kornelisse, 1991 <sup>81</sup>                 | Characteristics of meningococcal septic shock                                            | EU | 75  | 16 |
| Leclerc, 1989 <sup>82</sup>                    | Protein C and S in severe infectious purpura                                             | EU | 30  | 7  |
| Leclerc, 1986 <sup>83</sup>                    | Severity scores in meningococcal sepsis and shock                                        | EU | 35  | 13 |
| Carcillo, 1985 <sup>84</sup>                   | Role of early fluid resuscitation in septic shock                                        | NA | 34  | 16 |
| Pollack, 1985 <sup>85</sup>                    | Cardiopulmonary variables in septic shock survivors                                      | NA | 42  | 24 |
| Pollack, 1984 <sup>86</sup>                    | Sequential cardiopulmonary variables in septic shock                                     | NA | 32  | 18 |
| Mercier, 1982 <sup>87</sup>                    | Hemodynamic patterns of meningococcal shock                                              | EU | 39  | 15 |

Abbreviations: AO = Australia/Oceania, EU = Europe, NA = North America.

**eTable 3.** Characteristics of included studies conducted in developing countries

| Author, Study Year                                                 | Description of Study                                                                                                                                               | Continent | N   | Mortality |
|--------------------------------------------------------------------|--------------------------------------------------------------------------------------------------------------------------------------------------------------------|-----------|-----|-----------|
| <b>Randomised Controlled Trials</b>                                |                                                                                                                                                                    |           |     |           |
| Ramaswamy, 2013 <sup>88</sup>                                      | Dopamine vs. Epinephrine in septic shock                                                                                                                           | AA        | 31  | 18        |
| Ventura, 2011 <sup>89</sup>                                        | Dopamine vs. Epinephrine in septic shock                                                                                                                           | SA        | 63  | 13        |
| Chopra, 2007 <sup>90</sup>                                         | Hypertonic vs. normal saline in septic shock                                                                                                                       | AA        | 30  | 10        |
| Yildizdas, 2004 <sup>91</sup>                                      | Terlipressin as rescue therapy in septic shock                                                                                                                     | AA        | 28  | 20        |
| Santhanam, 2003 <sup>92</sup>                                      | Faster vs. slower fluid resuscitation in shock                                                                                                                     | AA        | 73  | 13        |
| Upadhyay, 1999 <sup>93</sup>                                       | Crystalloid vs. colloid in septic shock                                                                                                                            | AA        | 31  | 9         |
| <b>Observational Studies</b>                                       |                                                                                                                                                                    |           |     |           |
| Naveda, 2016 <sup>94</sup>                                         | Positive fluid balance and mortality in paediatric severe sepsis and septic shock                                                                                  | SA        | 16  | 63        |
| Wu, 2015 <sup>95</sup>                                             | Brain natriuretic peptide levels and cardiac dysfunction in shock                                                                                                  | AA        | 36  | 7         |
| Bustos B, 2015 <sup>96</sup>                                       | Predictive value of calcitonin in suspected sepsis                                                                                                                 | SA        | 11  | 31        |
| Cui, 2015 <sup>97</sup>                                            | High- versus standard-volume hemofiltration in children with severe sepsis                                                                                         | AA        | 24  | 72        |
| Chen, 2014 <sup>98</sup>                                           | Central venous-to-arterial carbon dioxide difference in paediatric septic shock                                                                                    | AA        | 21  | 48        |
| Ibrahiem, 2014 <sup>99</sup>                                       | Prognostic markers in sepsis                                                                                                                                       | AA        | 39  | 8         |
| Li, 2014 <sup>100</sup>                                            | Continuous blood purification in treating childhood severe sepsis                                                                                                  | AA        | 9   | 47        |
| Manzoli, 2014 <sup>101</sup>                                       | Suppression of human leukocyte antigen-DR in sepsis                                                                                                                | SA        | 29  | 7         |
| Rady, 2014 <sup>102</sup>                                          | Adrenocortical status in sepsis and septic shock                                                                                                                   | AF        | 30  | 15        |
| Ranjit, 2014 <sup>103</sup>                                        | Early norepinephrine in septic shock                                                                                                                               | AA        | 41  | 4         |
| Samransamruakjit, 2014 <sup>104</sup>                              | Interleukin-10 polymorphisms and clinical risk factors in severe sepsis and septic shock                                                                           | AA        | 33  | 7         |
| Yuan, 2014 <sup>105</sup>                                          | Impact of continuous blood purifications on T-cell subsets in children with severe sepsis                                                                          | AA        | 10  | 48        |
| Chen, 2013 <sup>106</sup>                                          | Fluid accumulation in severe sepsis                                                                                                                                | AA        | 202 | 61        |
| Kaur, 2012 <sup>9</sup>                                            | Clinical predictors of mortality in sepsis                                                                                                                         | AA        | 50  | 29        |
| Phumeetam, 2012 <sup>107</sup>                                     | Genetic association of tumor necrosis factor-alpha with sepsis and septic shock in pediatric patients                                                              | AA        | 10  | 23        |
| Jat, 2011 <sup>108</sup>                                           | Lactate as predictor of outcome in septic shock                                                                                                                    | AA        | 30  | 15        |
| Raj, 2011 <sup>109</sup>                                           | Myocardial dysfunction in septic shock                                                                                                                             | AA        | 30  | 2         |
| Sankar, 2011 <sup>110</sup>                                        | Venacaval oxygen saturation monitoring                                                                                                                             | AA        | 120 | 52        |
| Sankar, 2011 <sup>111</sup>                                        | Diastolic dysfunction in fluid-refractory shock                                                                                                                    | AA        | 56  | 19        |
| Karim, 2010 <sup>112</sup>                                         | ADAMTS-13 deficiency in severe sepsis                                                                                                                              | AA        | 80  | 32        |
| Ranjit, 2010 <sup>113</sup>                                        | Multimodal hemodynamic monitoring in shock                                                                                                                         | AA        | 48  | 4         |
| Samransamruakjit (post-implementation cohort), 2010 <sup>114</sup> | Clinical outcomes after utilizing surviving sepsis campaign in children with septic shock and prognostic value of plasma N-terminal pro B-type natriuretic peptide | AA        | 47  | 9         |

|                                                                   |                                                                                                                                                                    |    |     |     |
|-------------------------------------------------------------------|--------------------------------------------------------------------------------------------------------------------------------------------------------------------|----|-----|-----|
| Cartaya, 2009 <sup>115</sup>                                      | American College of Critical Care Medicine guidelines implementation in pediatric intensive care unit                                                              | SA | 280 | 31  |
| Jaramillo-Bustamante (Septic Shock), 2009 <sup>8</sup>            | Epidemiology of sepsis in pediatric intensive care unit: First Colombian multicentre study                                                                         | SA | 261 | 14  |
| Jaramillo-Bustamante (Severe Sepsis), 2009 <sup>8</sup>           | Epidemiology of sepsis in pediatric intensive care unit: First Colombian multicentre study                                                                         | SA | 503 | 171 |
| Xu, 2009 <sup>116</sup>                                           | Multiplex cytokine score for disease severity                                                                                                                      | AA | 111 | 15  |
| Carmona, 2008 <sup>117</sup>                                      | Inflammation, myocardial dysfunction in shock                                                                                                                      | SA | 20  | 6   |
| Oliveira, 2008 <sup>118</sup>                                     | Serum Troponin-I level in sepsis or septic shock                                                                                                                   | SA | 69  | 23  |
| Samransamruakjit (pre-implementation cohort), 2008 <sup>114</sup> | Clinical outcomes after utilizing surviving sepsis campaign in children with septic shock and prognostic value of plasma N-terminal pro B-type natriuretic peptide | AA | 66  | 28  |
| Santolaya, 2005 <sup>119</sup>                                    | Predictor of severe sepsis in the first 24 hours                                                                                                                   | SA | 116 | 12  |
| Lodha, 2004 <sup>120</sup>                                        | Thyroid function in sepsis and septic shock                                                                                                                        | AA | 24  | 12  |
| Onenli-Mungan, 2004 <sup>121</sup>                                | Growth hormone/insulin-like growth factor-I axis in sepsis and septic shock                                                                                        | AA | 21  | 15  |
| Pancera, 2004 <sup>122</sup>                                      | Predictive factors in severe sepsis and septic shock among children with cancer                                                                                    |    |     |     |
| Samransamruakjit, 2004 <sup>123</sup>                             | Protein C activity and clinical factors in early phase of septic shock and mortality association                                                                   | AA | 67  | 26  |
| Sarathi, 2004 <sup>124</sup>                                      | Adrenal status in septic shock with stimulation                                                                                                                    | AA | 30  | 15  |
| Casartelli, 2003 <sup>125</sup>                                   | Adrenal response in children with septic shock                                                                                                                     | SA | 22  | 7   |
| Branco, 2002 <sup>126</sup>                                       | Glucose level and mortality risk in septic shock                                                                                                                   | SA | 57  | 28  |
| Pizarro, 2002 <sup>127</sup>                                      | Adrenal insufficiency in septic shock                                                                                                                              | SA | 57  | 26  |
| Singh, 2001 <sup>128</sup>                                        | Clinical profile of shock                                                                                                                                          | AA | 34  | 18  |
| Goh, 1995 <sup>129</sup>                                          | Sepsis severity and outcome in multiple organ dysfunction syndrome                                                                                                 | AA | 20  | 13  |

Abbreviations: AA = Asia, SA = South America, AF = Africa.

**eTable 4.** Risk of bias of individual randomized clinical trials

| Author & Publication Year                     | Domains        |                  |                |                |                  |                |                      |                  | Overall Risk |
|-----------------------------------------------|----------------|------------------|----------------|----------------|------------------|----------------|----------------------|------------------|--------------|
|                                               | Selection Bias | Performance Bias | Attrition Bias | Detection Bias | Information Bias | Reporting Bias | Statistical Analyses | Confounding Bias |              |
| Ramaswamy, 2016 <sup>88</sup>                 | Low            | Low              | Low            | Low            | Unclear          | Low            | Low                  | Low              | Low          |
| Ventura, 2015 <sup>89</sup>                   | Low            | Low              | Low            | Low            | Low              | Low            | Low                  | Low              | Low          |
| Rivera, 2014 <sup>39</sup>                    | High           | Low              | Unclear        | Unclear        | Low              | Low            | Low                  | Unclear          | Moderate     |
| Long 2013 <sup>41</sup>                       | High           | Low              | Low            | Low            | Low              | Low            | High                 | Low              | Moderate     |
| Chopra 2011 <sup>90</sup>                     | Low            | Low              | Low            | High           | Low              | High           | High                 | Unclear          | Moderate     |
| Santhanam 2008 <sup>92</sup>                  | Low            | Low              | Low            | Low            | Low              | Low            | Low                  | Low              | Low          |
| Yildiszas 2008 <sup>91</sup>                  | Low            | High             | Low            | High           | Low              | Low            | High                 | Unclear          | Moderate     |
| Nadel 2007 <sup>10</sup> (28-day mortality)   | Low            | Low              | Low            | Low            | Low              | Low            | Unclear              | Low              | Low          |
| Nadel 2007 <sup>40</sup> (Hospital mortality) | Low            | Low              | Low            | Low            | Low              | Low            | Unclear              | Low              | Low          |
| Upadhyay 2004 <sup>93</sup>                   | Low            | High             | Unclear        | High           | High             | Low            | High                 | Unclear          | Moderate     |
| Levin 2000 <sup>42</sup>                      | Low            | Low              | Low            | Low            | Low              | Low            | Unclear              | Low              | Low          |
| Derkx 1999 <sup>43</sup>                      | Unclear        | Low              | Low            | Unclear        | Low              | Low            | Low                  | Low              | Moderate     |
| J5 Study Group <sup>44</sup>                  | Low            | Low              | Low            | Low            | Low              | Low            | Unclear              | Low              | Low          |

**eTable 5.** Risk of bias of individual observational studies

| Author & Publication Year                     | Domains   |               |                    | Overall Risk    |
|-----------------------------------------------|-----------|---------------|--------------------|-----------------|
|                                               | Selection | Comparability | Outcome: Mortality |                 |
| Alder, 2016 <sup>45</sup>                     | Low       | Low           | Low                | <b>Low</b>      |
| Carcillo, 2016 <sup>55</sup>                  | Low       | High          | Low                | <b>Moderate</b> |
| Chen, 2016 <sup>106</sup>                     | Low       | High          | Low                | <b>Moderate</b> |
| Fitrolaki, 2016 <sup>50</sup>                 | Low       | High          | Low                | <b>Moderate</b> |
| Ibrahiem, 2016 <sup>99</sup>                  | Low       | High          | Low                | <b>Moderate</b> |
| Lin, 2016 <sup>130</sup>                      | High      | High          | Low                | <b>Moderate</b> |
| Manzoli, 2016 <sup>101</sup>                  | Low       | High          | Low                | <b>Moderate</b> |
| Naveda, 2016 <sup>94</sup>                    | Low       | High          | Low                | <b>Moderate</b> |
| Ranjit, 2016 <sup>103</sup>                   | Low       | Low           | Low                | <b>Low</b>      |
| Wong, 2016 <sup>46</sup>                      | Low       | Low           | Low                | <b>Low</b>      |
| Bustos B, 2015 <sup>96</sup>                  | Low       | High          | Low                | <b>Moderate</b> |
| Cui, 2015 <sup>97</sup>                       | Low       | High          | Low                | <b>Moderate</b> |
| Weiss, 2015 (Hospital mortality) <sup>6</sup> | Low       | High          | Low                | <b>Low</b>      |
| Weiss, 2015 (PICU mortality) <sup>6</sup>     | Low       | High          | Low                | <b>Moderate</b> |
| Wu, 2015 <sup>95</sup>                        | Low       | High          | Low                | <b>Moderate</b> |
| Zurek, 2015 <sup>58</sup>                     | Low       | Low           | Low                | <b>Low</b>      |
| Carmona, 2014 <sup>117</sup>                  | Low       | High          | Low                | <b>Moderate</b> |
| Cartaya, 2014 <sup>115</sup>                  | Low       | High          | Low                | <b>Moderate</b> |
| Chen, 2014 <sup>98</sup>                      | Low       | High          | Low                | <b>Moderate</b> |
| Kaur, 2014 <sup>9</sup>                       | Low       | High          | Low                | <b>Moderate</b> |
| Li, 2014 <sup>100</sup>                       | Low       | High          | Low                | <b>Moderate</b> |
| Muszynski, 2014 <sup>47</sup>                 | Low       | Low           | Low                | <b>Low</b>      |
| Rady, 2014 <sup>102</sup>                     | Low       | Low           | Low                | <b>Low</b>      |
| Raj, 2014 <sup>109</sup>                      | Low       | High          | Low                | <b>Moderate</b> |
| Ranjit, 2014 <sup>113</sup>                   | Low       | High          | Low                | <b>Moderate</b> |
| Samransamruakjit, 2014 <sup>104</sup>         | Low       | Low           | Low                | <b>Low</b>      |
| Samransamruakjit(B), 2014 <sup>11404</sup>    | Low       | High          | Low                | <b>Moderate</b> |
| Sankar, 2014 <sup>110</sup>                   | Low       | Low           | Low                | <b>Low</b>      |
| Sankar(B), 2014 <sup>111</sup>                | Low       | High          | Low                | <b>Moderate</b> |
| Vila Perez, 2014 <sup>52</sup>                | Low       | High          | Low                | <b>Moderate</b> |
| Wong, 2014 <sup>48</sup>                      | Low       | High          | Low                | <b>Moderate</b> |
| Yuan, 2014 <sup>105</sup>                     | Low       | High          | Low                | <b>Moderate</b> |
| Deep, 2013 <sup>56</sup>                      | Low       | High          | Low                | <b>Moderate</b> |
| Karim, 2013 <sup>112</sup>                    | Low       | High          | Low                | <b>Moderate</b> |
| Mickiewicz, 2013 <sup>49</sup>                | Low       | Low           | Low                | <b>Low</b>      |
| Xu, 2013 <sup>116</sup>                       | Low       | Low           | Low                | <b>Low</b>      |
| Bagci, 2012 <sup>131</sup>                    | Low       | High          | Low                | <b>Moderate</b> |
| Jaramillo-Bustamante, 2012 <sup>8</sup>       | Low       | High          | Low                | <b>Moderate</b> |
| Phumeetham, 2012 <sup>107</sup>               | Low       | High          | Low                | <b>Moderate</b> |
| Wong, 2012 <sup>51</sup>                      | Low       | High          | Low                | <b>Moderate</b> |
| Jat, 2011 <sup>108</sup>                      | Low       | High          | Low                | <b>Moderate</b> |
| Verhoeven, 2011 <sup>70</sup>                 | Low       | High          | Low                | <b>Moderate</b> |
| Wong, 2011 <sup>53</sup>                      | Low       | High          | Low                | <b>Moderate</b> |
| Wynn, 2011 <sup>62</sup>                      | Low       | Low           | Low                | <b>Low</b>      |



|                                       |     |      |     |                 |
|---------------------------------------|-----|------|-----|-----------------|
| Bongers, 2010 <sup>54</sup>           | Low | High | Low | <b>Moderate</b> |
| Fisher, 2010 <sup>65</sup>            | Low | High | Low | <b>Moderate</b> |
| Nowak, 2010 <sup>57</sup>             | Low | High | Low | <b>Moderate</b> |
| Inwald, 2009 <sup>61</sup>            | Low | High | Low | <b>Moderate</b> |
| Emonts, 2008 <sup>75</sup>            | Low | Low  | Low | <b>Low</b>      |
| Oliveira, 2008 <sup>132</sup>         | Low | High | Low | <b>Moderate</b> |
| Santolaya, 2008 <sup>119</sup>        | Low | High | Low | <b>Moderate</b> |
| Wheeler, 2008 <sup>59</sup>           | Low | Low  | Low | <b>Low</b>      |
| Wolfler, 2008 <sup>64</sup>           | Low | High | Low | <b>Moderate</b> |
| Wong, 2008 <sup>60</sup>              | Low | High | Low | <b>Moderate</b> |
| Casartelli, 2007 <sup>125</sup>       | Low | Low  | Low | <b>Low</b>      |
| Michalek, 2007 <sup>63</sup>          | Low | Low  | Low | <b>Low</b>      |
| Samransamruakjit, 2007 <sup>123</sup> | Low | High | Low | <b>Moderate</b> |
| Sarhi, 2007 <sup>124</sup>            | Low | High | Low | <b>Moderate</b> |
| Goldstein, 2006 <sup>66</sup>         | Low | High | Low | <b>Moderate</b> |
| Lodha, 2006 <sup>133</sup>            | Low | Low  | Low | <b>Low</b>      |
| Singh, 2006 <sup>128</sup>            | Low | High | Low | <b>Moderate</b> |
| Branco, 2005 <sup>126</sup>           | Low | Low  | Low | <b>Low</b>      |
| Pizarro, 2005 <sup>127</sup>          | Low | Low  | Low | <b>Low</b>      |
| Barton, 2004 <sup>67</sup>            | Low | High | Low | <b>Moderate</b> |
| Onenli-Mungan, 2004 <sup>121</sup>    | Low | Low  | Low | <b>Low</b>      |
| Pancera, 2004 <sup>122</sup>          | Low | High | Low | <b>Moderate</b> |
| de Groof, 2002 <sup>72</sup>          | Low | High | Low | <b>Moderate</b> |
| Leteurte, 2001 <sup>134</sup>         | Low | High | Low | <b>Moderate</b> |
| Hatherill, 2000 <sup>68</sup>         | Low | High | Low | <b>Moderate</b> |
| ten Have, 2000 <sup>69</sup>          | Low | High | Low | <b>Moderate</b> |
| Thiru, 2000 <sup>74</sup>             | Low | Low  | Low | <b>Low</b>      |
| Goh, 1999 <sup>129</sup>              | Low | High | Low | <b>Moderate</b> |
| Hatherill, 1999 <sup>76</sup>         | Low | Low  | Low | <b>Low</b>      |
| Ceneviva, 1998 <sup>71</sup>          | Low | High | Low | <b>Moderate</b> |
| Hatherill, 1998 <sup>77</sup>         | Low | High | Low | <b>Moderate</b> |
| Hazelzet, 1998 <sup>80</sup>          | Low | High | Low | <b>Moderate</b> |
| Krafte-Jacobs, 1998 <sup>73</sup>     | Low | Low  | Low | <b>Low</b>      |
| Kornelisse, 1997 <sup>81</sup>        | Low | High | Low | <b>Moderate</b> |
| Derkx, 1995 <sup>79</sup>             | Low | High | Low | <b>Moderate</b> |
| Leclerc, 1995 <sup>83</sup>           | Low | High | Low | <b>Moderate</b> |
| Leclerc, 1992 <sup>82</sup>           | Low | High | Low | <b>Moderate</b> |
| Carcillo, 1991 <sup>84</sup>          | Low | High | Low | <b>Moderate</b> |
| Mercier, 1988 <sup>87</sup>           | Low | High | Low | <b>Moderate</b> |
| Pollack, 1985 <sup>85</sup>           | Low | High | Low | <b>Moderate</b> |
| Pollack, 1984 <sup>86</sup>           | Low | High | Low | <b>Moderate</b> |

**eFigure 1.** Cumulative forest plot of case fatality rates from studies conducted in developed countries

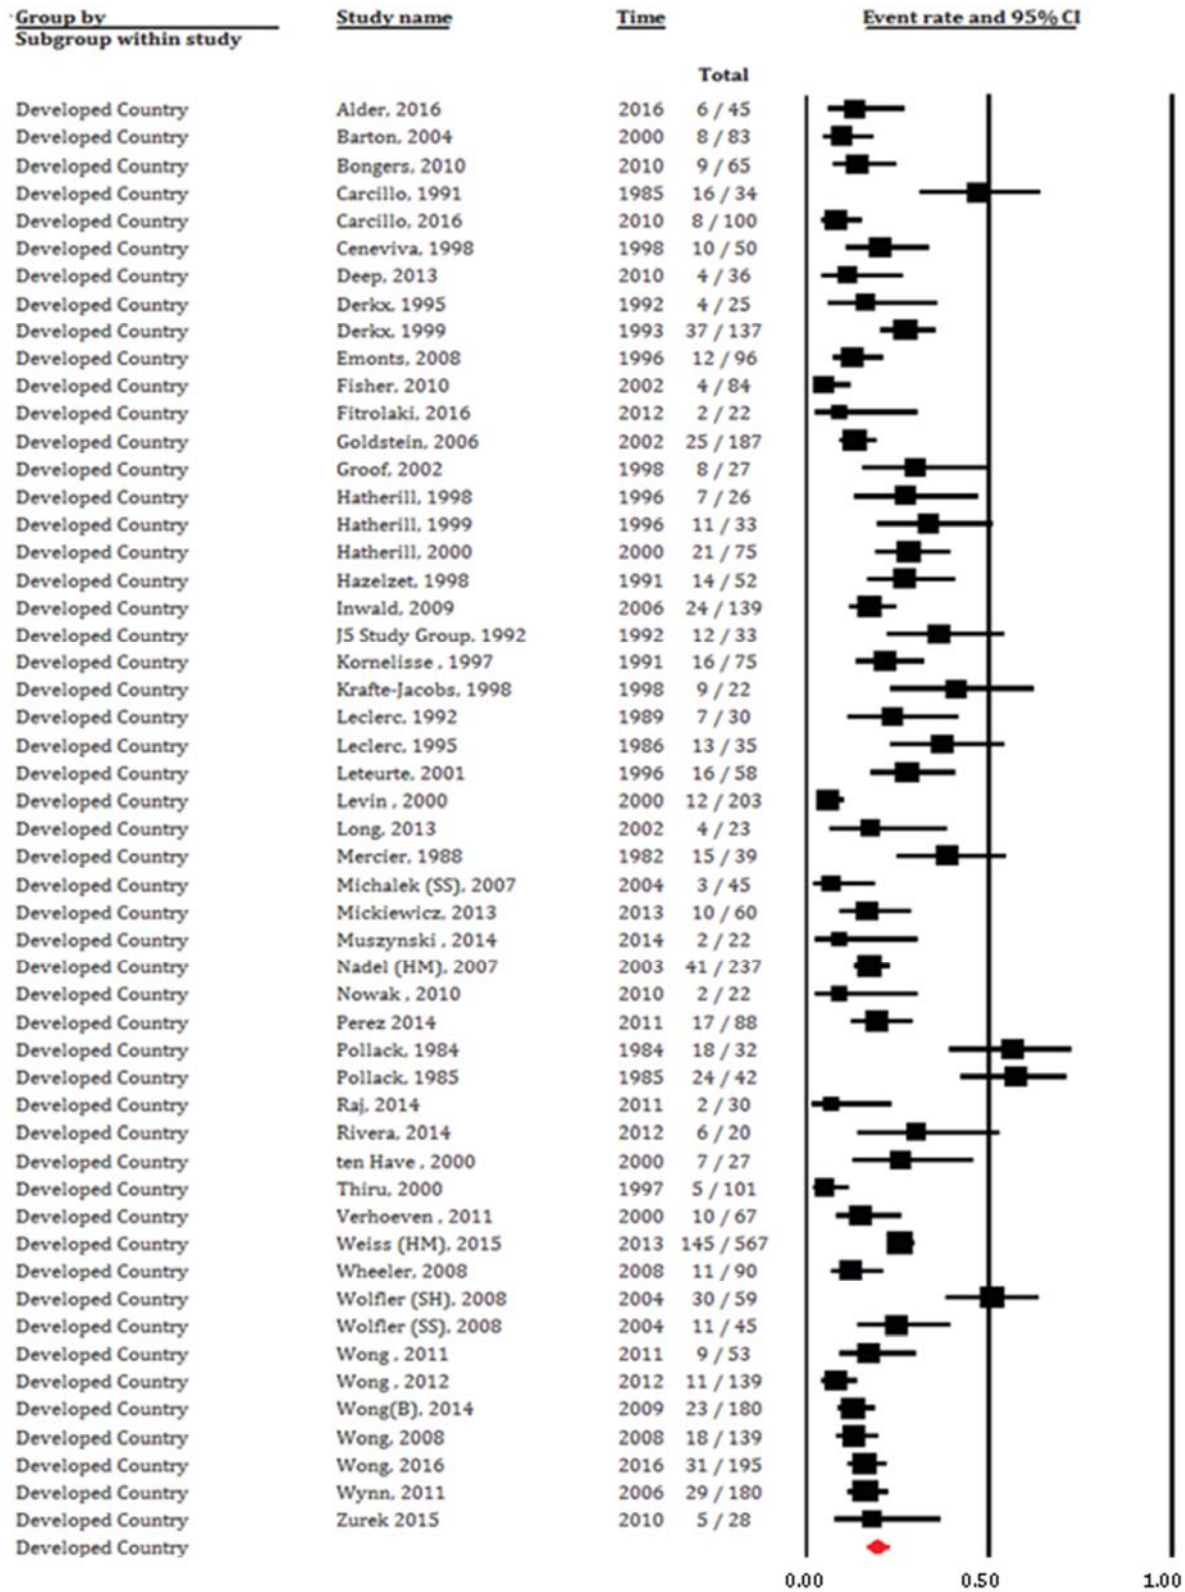

Heterogeneity:  $\tau^2 = 0.365$ ,  $df = 51$ ,  $I^2 = 80.5$

**eFigure 2.** Cumulative forest plot of case fatality rates from studies conducted in developing countries

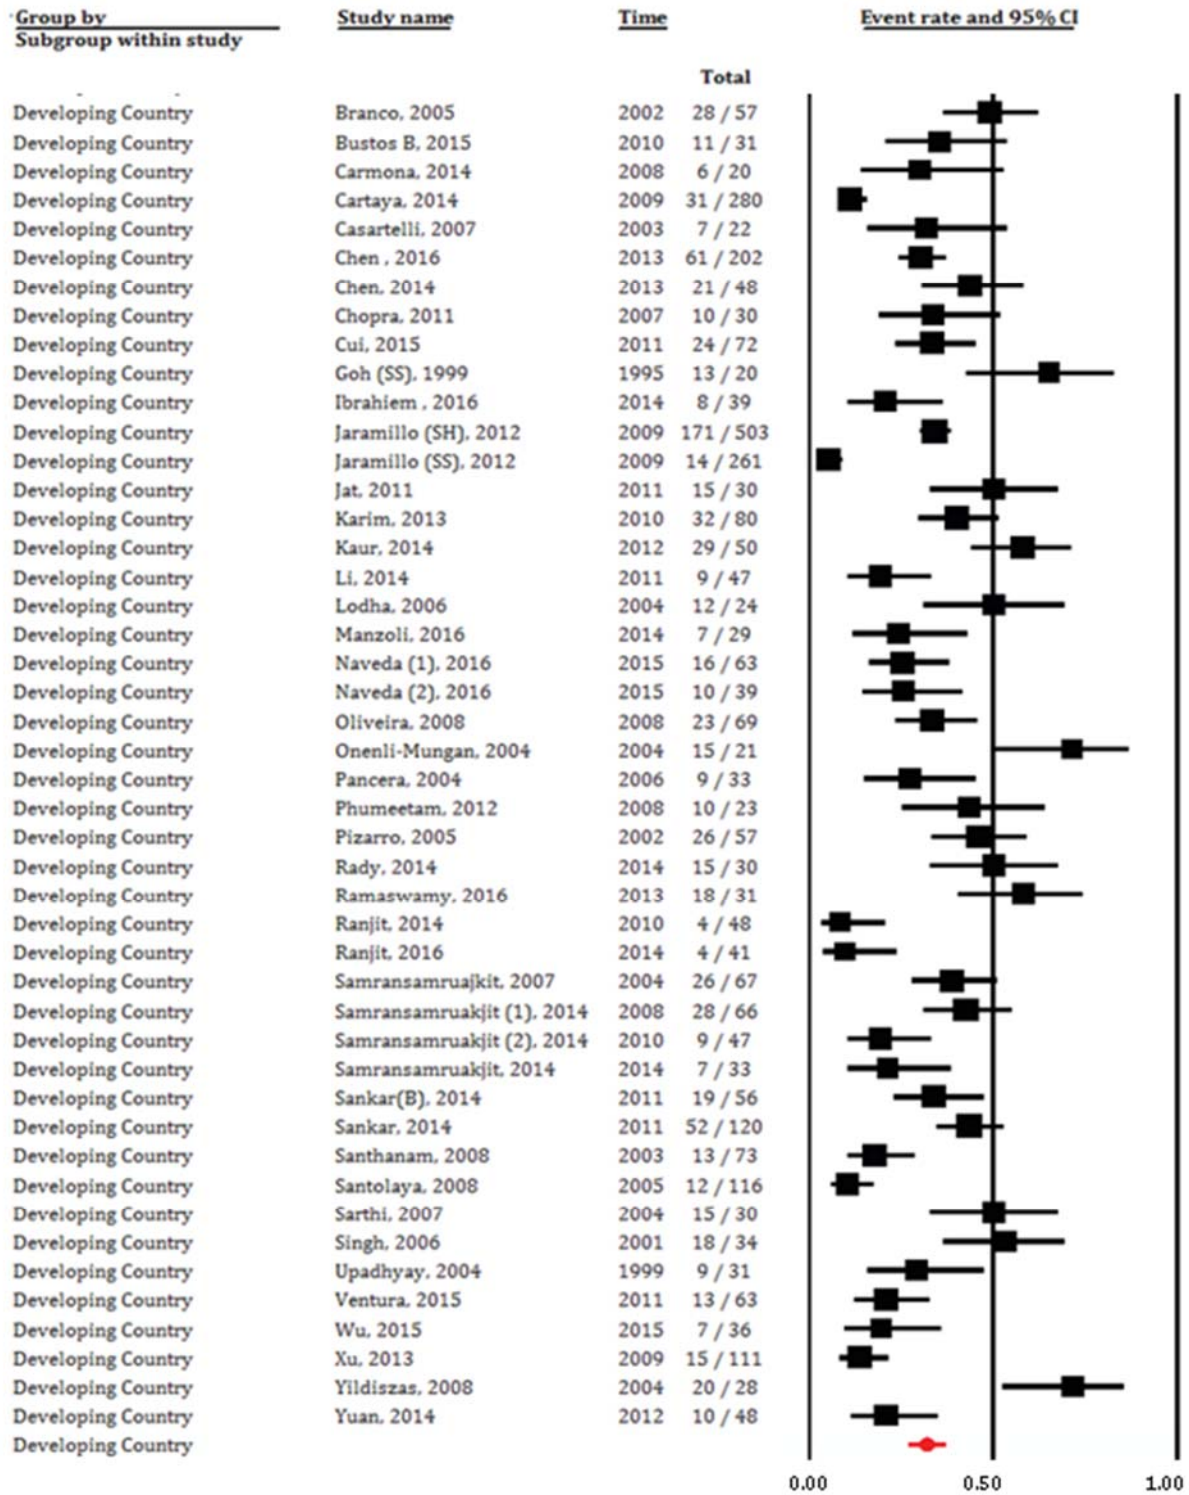

Heterogeneity:  $\tau^2 = 0.469$ ,  $df = 45$ ,  $I^2 = 85.3$

**eFigure 3.** Forest plot of case fatality rates from randomized clinical trials

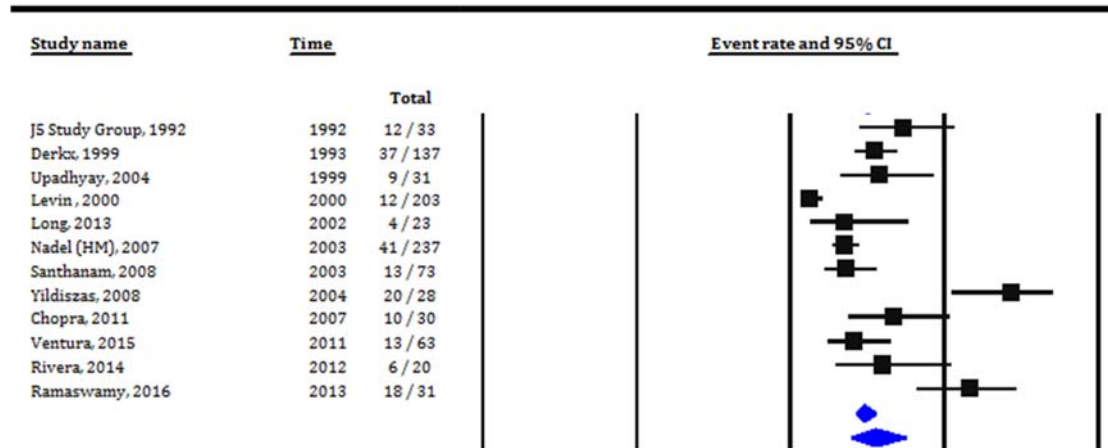

Heterogeneity:  $\tau^2 = 0.630$ ,  $df = 11$ ,  $I^2 = 86.9$

**eFigure 4.** Forest plot of case fatality rates from observational studies

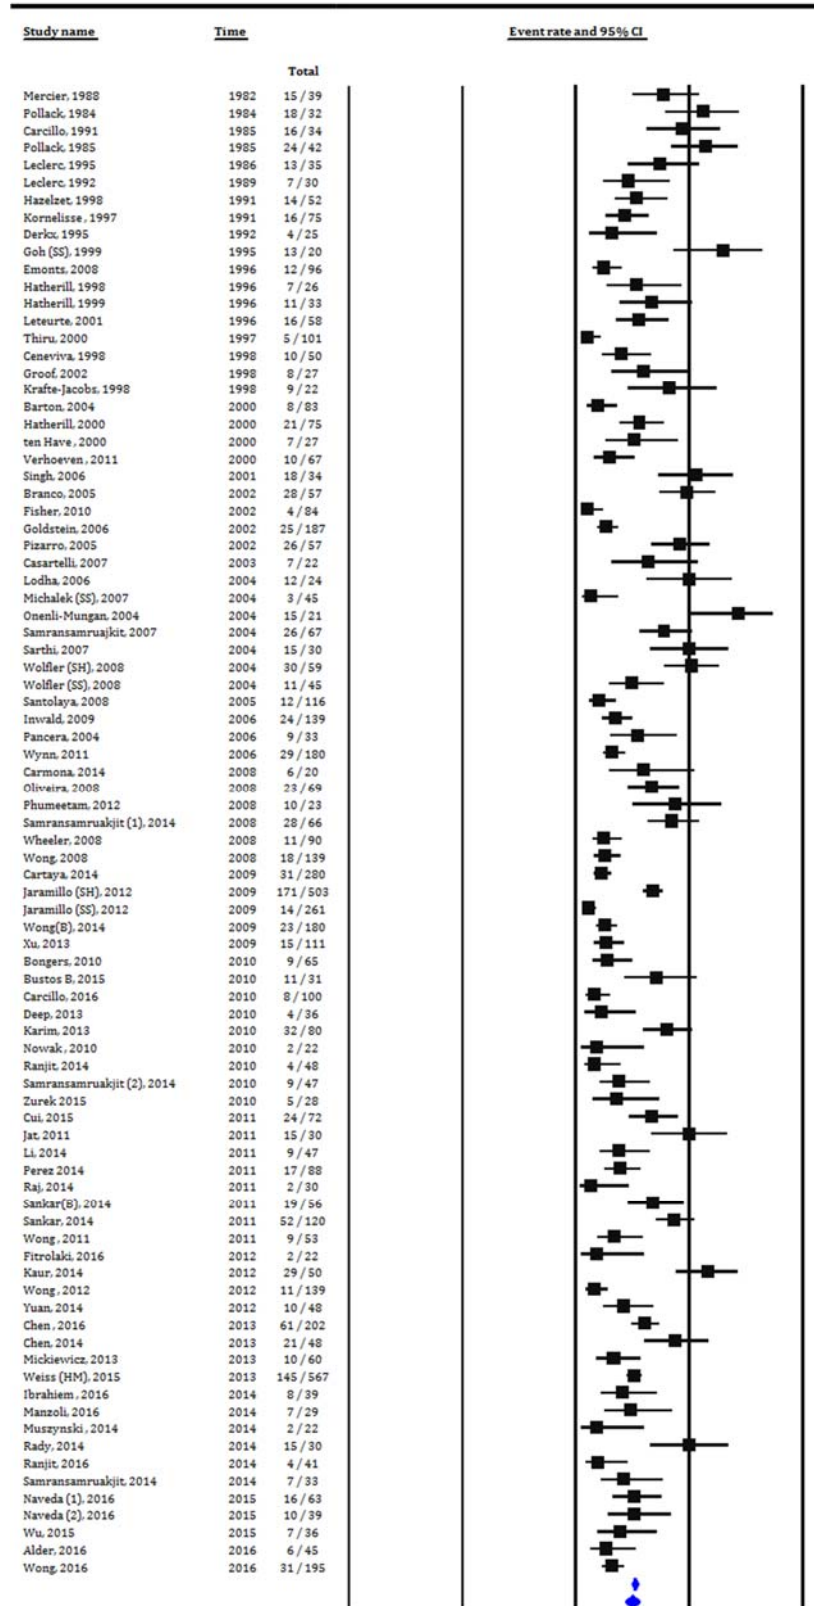

Heterogeneity:  $\tau^2 = 0.482$ ,  $df = 85$ ,  $I^2 = 85.4$



**eFigure 5.** Forest plot of case fatality rates from studies with severe sepsis populations

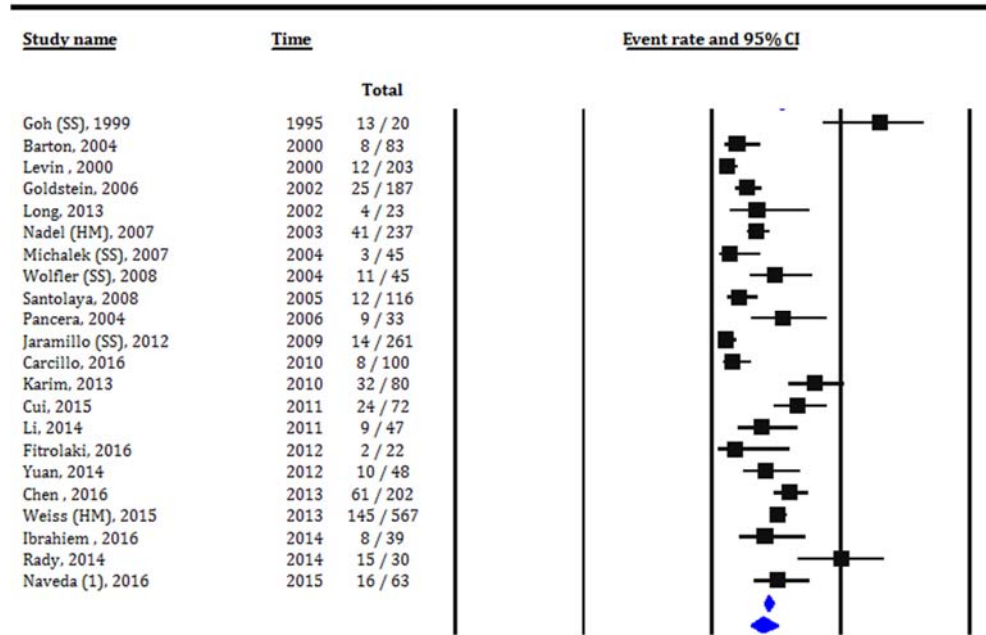

Severe Sepsis (SS) Studies Heterogeneity:  $\text{Tau}^2 = 0.458$ ,  $\text{df} = 21$ ,  $I^2 = 87.2\%$

**eFigure 6.** Forest plot of case fatality rates from studies with septic shock populations

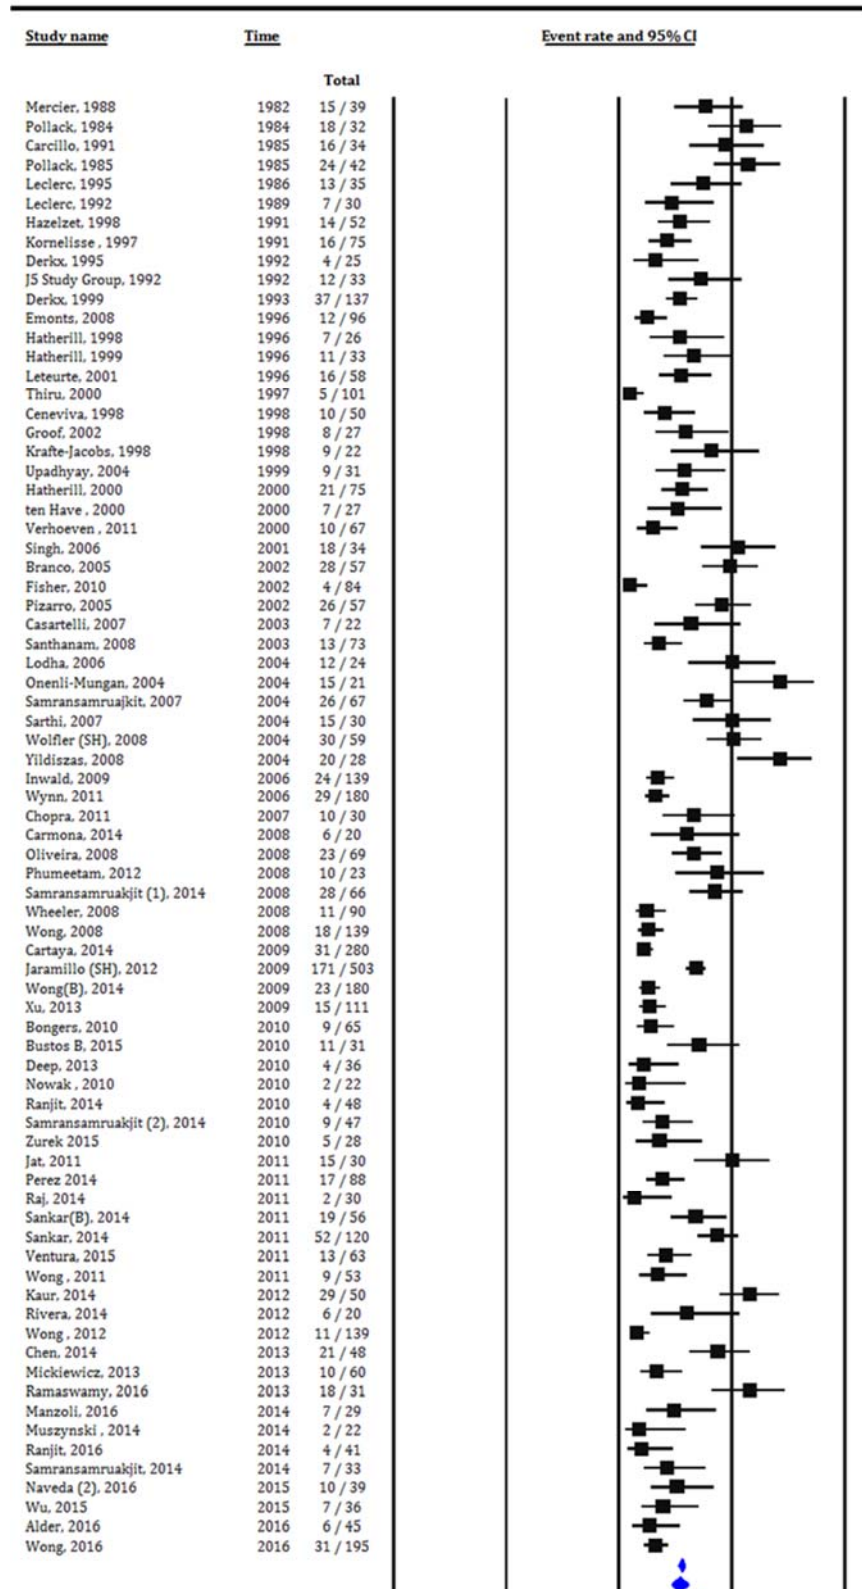

Septic Shock (SH) Studies Heterogeneity:  $Tau^2 = 0.496$ ,  $df = 75$ ,  $I^2 = 84.2$

**eFigure 7.** Forest plot of case fatality rates from high-quality studies with low risk of bias

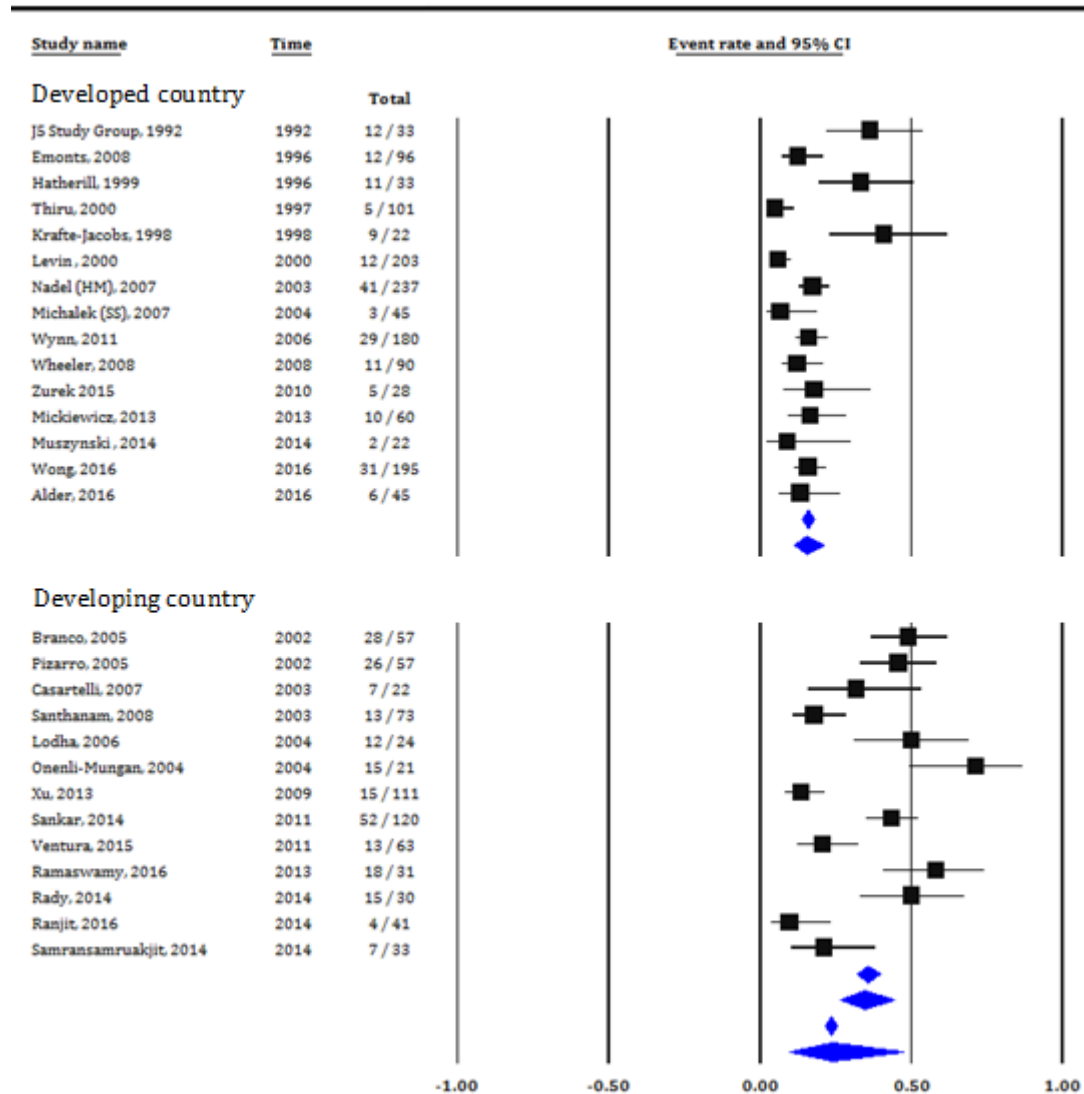

Risk of bias assessed by Cochrane Risk of Bias or Newcastle-Ottawa Scale, stratified by socioeconomic status of country



**eFigure 8.** Time-trend of pooled weighted mortality rates from 1982 to 2016 (by year of study) for high-quality studies with low risk of bias

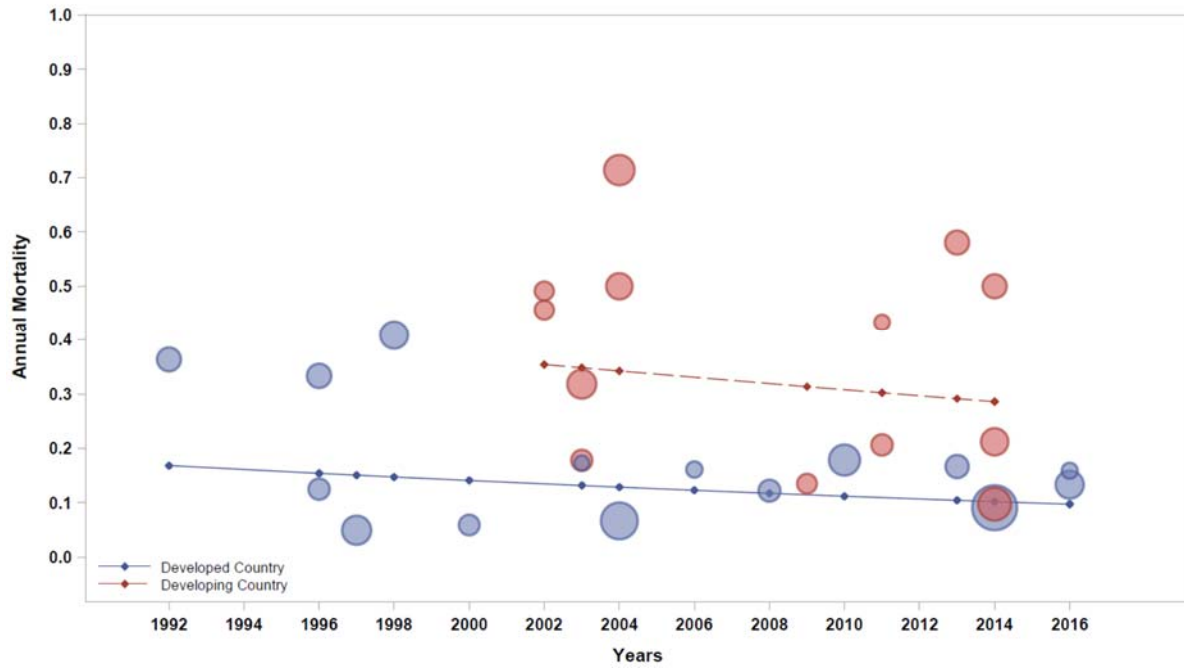

Risk of bias assessed by Cochrane Risk of Bias or Newcastle-Ottawa Scale. Adjusted by socioeconomic status of country. The size of the bubble is proportional to the total number of patients recruited in the corresponding study.

## eReferences.

1. Watson RS, Carcillo JA. Scope and epidemiology of pediatric sepsis. *Pediatr Crit Care Med* 2005; **6**(3 Suppl): S3-5.
2. Watson RS, Carcillo JA, Linde-Zwirble WT, Clermont G, Lidicker J, Angus DC. The epidemiology of severe sepsis in children in the United States. *American journal of respiratory and critical care medicine* 2003; **167**(5): 695-701.
3. Singer M, Deutschman CS, Seymour CW, et al. The Third International Consensus Definitions for Sepsis and Septic Shock (Sepsis-3). *JAMA* 2016; **315**(8): 801-10.
4. Ismail J, Sankar J. Systemic Inflammatory Response Syndrome (SIRS) and Sepsis - An Ever-evolving Paradigm. *Indian journal of pediatrics* 2015; **82**(8): 675-6.
5. Bryce J, Boschi-Pinto C, Shibuya K, Black RE, Group WHOCHER. WHO estimates of the causes of death in children. *Lancet* 2005; **365**(9465): 1147-52.
6. Weiss SL, Fitzgerald JC, Pappachan J, et al. Global epidemiology of pediatric severe sepsis: the Sepsis Prevalence, Outcomes, and Therapies Study. *Am J Respir Crit Care Med* 2015; **191**(10): 1147-57.
7. Wolfer A, Silvani P, Musicco M, Antonelli M, Salvo I, Italian Pediatric Sepsis Study g. Incidence of and mortality due to sepsis, severe sepsis and septic shock in Italian pediatric intensive care units: a prospective national survey. *Intensive Care Med* 2008; **34**(9): 1690-7.
8. Jaramillo-Bustamante JC, Marin-Agudelo A, Fernandez-Laverde M, Bareno-Silva J. Epidemiology of sepsis in pediatric intensive care units: first Colombian multicenter study. *Pediatric critical care medicine : a journal of the Society of Critical Care Medicine and the World Federation of Pediatric Intensive and Critical Care Societies* 2012; **13**(5): 501-8.
9. Kaur G, Vinayak N, Mittal K, Kaushik JS, Aamir M. Clinical outcome and predictors of mortality in children with sepsis, severe sepsis, and septic shock from Rohtak, Haryana: A prospective observational study. *Indian J Crit Care Med* 2014; **18**(7): 437-41.
10. Nadel S, Goldstein B, Williams MD, et al. Drotrecogin alfa (activated) in children with severe sepsis: a multicentre phase III randomised controlled trial. *Lancet* 2007; **369**(9564): 836-43.
11. Stevenson EK, Rubenstein AR, Radin GT, Wiener RS, Walkey AJ. Two decades of mortality trends among patients with severe sepsis: a comparative meta-analysis\*. *Crit Care Med* 2014; **42**(3): 625-31.
12. Nations U. Country classification. 2014.
13. Kissoon N, Carcillo JA, Espinosa V, et al. World Federation of Pediatric Intensive Care and Critical Care Societies: Global Sepsis Initiative. *Pediatr Crit Care Med* 2011; **12**(5): 494-503.
14. Baelani I, Jochberger S, Laimer T, et al. Availability of critical care resources to treat patients with severe sepsis or septic shock in Africa: a self-reported, continent-wide survey of anaesthesia providers. *Crit Care* 2011; **15**(1): R10.
15. Goldstein B, Giroir B, Randolph A, International Consensus Conference on Pediatric S. International pediatric sepsis consensus conference: definitions for sepsis and organ dysfunction in pediatrics. *Pediatr Crit Care Med* 2005; **6**(1): 2-8.
16. Liberati A, Altman DG, Tetzlaff J, et al. The PRISMA statement for reporting systematic reviews and meta-analyses of studies that evaluate health care interventions: explanation and elaboration. *Journal of clinical epidemiology* 2009; **62**(10): e1-34.
17. Brierley J, Carcillo JA, Choong K, et al. Clinical practice parameters for hemodynamic support of pediatric and neonatal septic shock: 2007 update from the American College of Critical Care Medicine. *Critical care medicine* 2009; **37**(2): 666-88.
18. Murad MH, Asi N, Alsawas M, Alahdab F. New evidence pyramid. *Evid Based Med* 2016; **21**(4): 125-7.
19. Higgins JPT, Altman DG, Gøtzsche PC, et al. The Cochrane Collaboration's tool for assessing risk of bias in randomised trials. *BMJ* 2011; **343**.
20. Wells GA SB, O'Connell D, Peterson J, Welch V, Losos M, et al. The Newcastle-Ottawa Scale (NOS) for assessing the quality of nonrandomized studies in meta-analyses.
21. Sterne JA, Sutton AJ, Ioannidis JP, et al. Recommendations for examining and interpreting funnel plot asymmetry in meta-analyses of randomised controlled trials. *BMJ* 2011; **343**: d4002.
22. Egger M, Davey Smith G, Schneider M, Minder C. Bias in meta-analysis detected by a simple, graphical test. *BMJ* 1997; **315**(7109): 629-34.
23. Dellinger RP, Carlet JM, Masur H, et al. Surviving Sepsis Campaign guidelines for management of severe sepsis and septic shock. *Intensive Care Med* 2004; **30**(4): 536-55.

24. Dellinger RP, Levy MM, Carlet JM, et al. Surviving Sepsis Campaign: international guidelines for management of severe sepsis and septic shock: 2008. *Crit Care Med* 2008; **36**(1): 296-327.
25. Dellinger RP, Levy MM, Rhodes A, et al. Surviving Sepsis Campaign: international guidelines for management of severe sepsis and septic shock, 2012. *Intensive Care Med* 2013; **39**(2): 165-228.
26. Rhodes A, Evans LE, Alhazzani W, et al. Surviving Sepsis Campaign: International guidelines for management of sepsis and septic shock: 2016. *Crit Care Med* 2017; **45**(3): 486-552.
27. Serpa Neto A, Schultz MJ, Festic E. Ventilatory support of patients with sepsis or septic shock in resource-limited settings. *Intensive Care Med* 2016; **42**(1): 100-3.
28. Kwizera A, Festic E, Dunser MW. What's new in sepsis recognition in resource-limited settings? *Intensive Care Med* 2016; **42**(12): 2030-3.
29. Musa N, Murthy S, Kissoon N. Pediatric sepsis and septic shock management in resource-limited settings. *Intensive Care Med* 2016; **42**(12): 2037-9.
30. Thwaites CL, Lundeg G, Dondorp AM, sepsis in resource-limited settings-expert consensus recommendations group of the European Society of Intensive Care M, the Mahidol-Oxford Research Unit in Bangkok T. Recommendations for infection management in patients with sepsis and septic shock in resource-limited settings. *Intensive Care Med* 2016; **42**(12): 2040-2.
31. Mittelmark MB. Millenium Development Goals. *Glob Health Promot* 2009; **16**(4): 3-4, 73-4, 88-9.
32. Rao ND PS. Energy access and living standards: Some observations on recent trends. *Environmental Research Letters* 2017; **12**: 025011.
33. Schultz MJ, Dunser MW, Dondorp AM, et al. Current challenges in the management of sepsis in ICUs in resource-poor settings and suggestions for the future. *Intensive Care Med* 2017; **43**(5): 612-24.
34. Wiens MO, Pawluk S, Kissoon N, et al. Pediatric post-discharge mortality in resource poor countries: a systematic review. *PloS one* 2013; **8**(6): e66698.
35. Phua J, Badia JR, Adhikari NK, et al. Has mortality from acute respiratory distress syndrome decreased over time?: A systematic review. *American journal of respiratory and critical care medicine* 2009; **179**(3): 220-7.
36. Murthy S, Kissoon N. After the FEAST--fluid resuscitation in pediatric sepsis. *Indian journal of pediatrics* 2013; **80**(2): 151-4.
37. Maitland K, Kiguli S, Opoka RO, et al. Mortality after fluid bolus in African children with severe infection. *N Engl J Med* 2011; **364**(26): 2483-95.
38. Weiss SL, Parker B, Bullock ME, et al. Defining pediatric sepsis by different criteria: discrepancies in populations and implications for clinical practice. *Pediatr Crit Care Med* 2012; **13**(4): e219-26.
39. Rivera NG, Chon IF, Zarate MGG, Figueroa COG, García LV. Contrasting two antibiotics schemes in children with septic shock spotted fever of the Rocky Mountains. *Revista Mexicana de Pediatría* 2014; **81**(6): 204-8.
40. Nadel S, Goldstein B, Williams MD, et al. Drotrecogin alfa (activated) in children with severe sepsis: a multicentre phase III randomised controlled trial. *Lancet (London, England)* 2007; **369**(9564): 836-43.
41. Long EJ, Shann F, Pearson G, Buckley D, Butt W. A randomised controlled trial of plasma filtration in severe paediatric sepsis. *Critical care and resuscitation : journal of the Australasian Academy of Critical Care Medicine* 2013; **15**(3): 198-204.
42. Levin M, Quint PA, Goldstein B, et al. Recombinant bactericidal/permeability-increasing protein (rBPI21) as adjunctive treatment for children with severe meningococcal sepsis: A randomised trial. *Lancet (London, England)* 2000; **356**(9234): 961-7.
43. Derkx B, Wittes J, McCloskey R. Randomized, placebo-controlled trial of HA-1A, a human monoclonal antibody to endotoxin, in children with meningococcal septic shock. European Pediatric Meningococcal Septic Shock Trial Study Group. *Clinical infectious diseases : an official publication of the Infectious Diseases Society of America* 1999; **28**(4): 770-7.
44. Treatment of severe infectious purpura in children with human plasma from donors immunized with Escherichia coli J5: a prospective double-blind study. J5 study Group. *J Infect Dis* 1992; **165**(4): 695-701.
45. Alder MN, Opoka AM, Lahni P, Hildeman DA, Wong HR. Olfactomedin-4 Is a Candidate Marker for a Pathogenic Neutrophil Subset in Septic Shock. *Critical care medicine* 2016.
46. Wong HR, Cvijanovich NZ, Anas N, et al. Pediatric Sepsis Biomarker Risk Model-II: Redefining the Pediatric Sepsis Biomarker Risk Model With Septic Shock Phenotype. *Critical care medicine* 2016; **44**(11): 2010-7.
47. Muszynski JA, Nofziger R, Greathouse K, et al. Early adaptive immune suppression in children with septic shock: a prospective observational study. *Critical Care* 2014; **18**(4).
48. Wong HR, Weiss SL, Giuliano Jr JS, et al. The temporal version of the pediatric sepsis biomarker risk model. *PloS one* 2014; **9**(3).

49. Mickiewicz B, Vogel HJ, Wong HR, Winston BW. Metabolomics as a novel approach for early diagnosis of pediatric septic shock and its mortality. *American journal of respiratory and critical care medicine* 2013; **187**(9): 967-76.
50. Fitrolaki MD, Dimitriou H, Venihaki M, Katrinaki M, Ilia S, Briassoulis G. Increased extracellular heat shock protein 90a in severe sepsis and SIRS associated with multiple organ failure and related to acute inflammatory/metabolic stress response in children. *Medicine (United States)* 2016; **95**(35).
51. Wong HR, Salisbury S, Xiao Q, et al. The pediatric sepsis biomarker risk model. *Critical Care* 2012; **16**(5).
52. Vila Perez D, Jordan I, Esteban E, et al. Prognostic factors in pediatric sepsis study, from the Spanish Society of Pediatric Intensive Care. *The Pediatric infectious disease journal* 2014; **33**(2): 152-7.
53. Wong HR, Cvijanovich NZ, Allen GL, et al. Validation of a gene expression-based subclassification strategy for pediatric septic shock. *Critical care medicine* 2011; **39**(11): 2511-7.
54. Bongers TN, Emonts M, de Maat MP, et al. Reduced ADAMTS13 in children with severe meningococcal sepsis is associated with severity and outcome. *Thrombosis and haemostasis* 2010; **103**(6): 1181-7.
55. Carcillo JA, Sward K, Halstead ES, et al. A Systemic Inflammation Mortality Risk Assessment Contingency Table for Severe Sepsis. *Pediatric Critical Care Medicine* 2016.
56. Deep A, Goonasekera CDA, Wang YZ, Brierley J. Evolution of haemodynamics and outcome of fluid-refractory septic shock in children. *Intensive care medicine* 2013; **39**(9): 1602-9.
57. Nowak JE, Wheeler DS, Harmon KK, Wong HR. Admission chemokine (C-C motif) ligand 4 levels predict survival in pediatric septic shock. *Pediatric critical care medicine : a journal of the Society of Critical Care Medicine and the World Federation of Pediatric Intensive and Critical Care Societies* 2010; **11**(2): 213-6.
58. Zurek J, Vavrina M. Procalcitonin Biomarker Kinetics to Predict Multiorgan Dysfunction Syndrome in Children With Sepsis and Systemic Inflammatory Response Syndrome. *Iran J Pediatr* 2015; **25**(1): e324.
59. Wheeler DS, Devarajan P, Ma D, et al. Serum neutrophil gelatinase-associated lipocalin (NGAL) as a marker of acute kidney injury in critically ill children with septic shock. *Critical care medicine* 2008; **36**(4): 1297-303.
60. Wong HR, Cvijanovich N, Wheeler DS, et al. Interleukin-8 as a stratification tool for interventional trials involving pediatric septic shock. *American journal of respiratory and critical care medicine* 2008; **178**(3): 276-82.
61. Inwald DP, Tasker RC, Peters MJ, Nadel S. Emergency management of children with severe sepsis in the United Kingdom: the results of the Paediatric Intensive Care Society sepsis audit. *Archives of disease in childhood* 2009; **94**(5): 348-53.
62. Wynn JL, Cvijanovich NZ, Allen GL, et al. The Influence of Developmental Age on the Early Transcriptomic Response of Children with Septic Shock. *Molecular Medicine* 2011; **17**(11-12): 1146-56.
63. Michalek J, Svetlikova P, Fedora M, et al. Bactericidal permeability increasing protein gene variants in children with sepsis. *Intensive care medicine* 2007; **33**(12): 2158-64.
64. Wolfler A, Silvani P, Musicco M, Antonelli M, Salvo I. Incidence of and mortality due to sepsis, severe sepsis and septic shock in Italian Pediatric Intensive Care Units: a prospective national survey. *Intensive care medicine* 2008; **34**(9): 1690-7.
65. Fisher JD, Nelson DG, Beyersdorf H, Satkowiak LJ. Clinical spectrum of shock in the pediatric emergency department. *Pediatric emergency care* 2010; **26**(9): 622-5.
66. Goldstein B, Nadel S, Peters M, et al. ENHANCE: results of a global open-label trial of drotrecogin alfa (activated) in children with severe sepsis. *Pediatric Critical Care Medicine* 2006; **7**(3): 200-11.
67. Barton P, Kalil AC, Nadel S, et al. Safety, pharmacokinetics, and pharmacodynamics of drotrecogin alfa (activated) in children with severe sepsis. *Pediatrics* 2004; **113**(1 Pt 1): 7-17.
68. Hatherill M, Tibby SM, Turner C, Ratnavel N, Murdoch IA. Procalcitonin and cytokine levels: relationship to organ failure and mortality in pediatric septic shock. *Critical care medicine* 2000; **28**(7): 2591-4.
69. Ten Have TR, Miller ME, Reboussin BA, James MK. Mixed effects logistic regression models for longitudinal ordinal functional response data with multiple-cause drop-out from the longitudinal study of aging. *Biometrics* 2000; **56**(1): 279-87.
70. Verhoeven JJ, den Brinker M, Hokken-Koelega AC, Hazelzet JA, Joosten KF. Pathophysiological aspects of hyperglycemia in children with meningococcal sepsis and septic shock: a prospective, observational cohort study. *Crit Care* 2011; **15**(1): R44.
71. Ceneviva G, Paschall JA, Maffei F, Carcillo JA. Hemodynamic support in fluid-refractory pediatric septic shock. *Pediatrics* 1998; **102**(2): e19.
72. de Groof F, Joosten KF, Janssen JA, et al. Acute stress response in children with meningococcal sepsis: important differences in the growth hormone/insulin-like growth factor I axis between nonsurvivors and survivors. *The Journal of clinical endocrinology and metabolism* 2002; **87**(7): 3118-24.

73. Krafte-Jacobs B, Brilli R. Increased circulating thrombomodulin in children with septic shock. *Critical care medicine* 1998; **26**(5): 933-8.
74. Thiru Y, Pathan N, Bignall S, Habibi P, Levin M. A myocardial cytotoxic process is involved in the cardiac dysfunction of meningococcal septic shock. *Critical care medicine* 2000; **28**(8): 2979-83.
75. Emonts M, de Bruijne EL, Guimaraes AH, et al. Thrombin-activatable fibrinolysis inhibitor is associated with severity and outcome of severe meningococcal infection in children. *Journal of thrombosis and haemostasis : JTH* 2008; **6**(2): 268-76.
76. Hatherill M, Tibby SM, Hilliard T, Turner C, Murdoch IA. Adrenal insufficiency in septic shock. *Archives of disease in childhood* 1999; **80**(1): 51-5.
77. Hatherill M, Tibby SM, Evans R, Murdoch IA. Gastric tonometry in septic shock. *Archives of disease in childhood* 1998; **78**(2): 155-8.
78. Leteurtre S, Martinot A, Duhamel A, et al. Development of a pediatric multiple organ dysfunction score: use of two strategies. *Med Decis Making* 1999; **19**(4): 399-410.
79. Derkx B, Marchant A, Goldman M, Bijlmer R, van Deventer S. High levels of interleukin-10 during the initial phase of fulminant meningococcal septic shock. *J Infect Dis* 1995; **171**(1): 229-32.
80. Hazelzet JA, de Groot R, van Mierlo G, et al. Complement activation in relation to capillary leakage in children with septic shock and purpura. *Infection and immunity* 1998; **66**(11): 5350-6.
81. Kornelisse RF, Hazelzet JA, Hop WC, et al. Meningococcal septic shock in children: clinical and laboratory features, outcome, and development of a prognostic score. *Clinical infectious diseases : an official publication of the Infectious Diseases Society of America* 1997; **25**(3): 640-6.
82. Leclerc F, Hazelzet J, Jude B, et al. Protein C and S deficiency in severe infectious purpura of children: a collaborative study of 40 cases. *Intensive care medicine* 1992; **18**(4): 202-5.
83. Leclerc F, Delepouille F, Diependaele JF, et al. Severity scores in meningococcal septicemia and severe infectious purpura with shock. *Intensive care medicine* 1995; **21**(3): 264-5.
84. Carcillo JA, Davis AL, Zaritsky A. Role of early fluid resuscitation in pediatric septic shock. *Jama* 1991; **266**(9): 1242-5.
85. Pollack MM, Fields AI, Ruttimann UE. Distributions of cardiopulmonary variables in pediatric survivors and nonsurvivors of septic shock. *Critical care medicine* 1985; **13**(6): 454-9.
86. Pollack MM, Fields AI, Ruttimann UE. Sequential cardiopulmonary variables of infants and children in septic shock. *Crit Care Med* 1984; **12**(7): 554-9.
87. Mercier JC, Beaufils F, Hartmann JF, Azema D. Hemodynamic patterns of meningococcal shock in children. *Critical care medicine* 1988; **16**(1): 27-33.
88. Ramaswamy KN, Singhi S, Jayashree M, Bansal A, Nallasamy K. Double-Blind Randomized Clinical Trial Comparing Dopamine and Epinephrine in Pediatric Fluid-Refractory Hypotensive Septic Shock\*. *Pediatric Critical Care Medicine* 2016; **17**(11): e502-e12.
89. Ventura AM, Shieh HH, Bouso A, et al. Double-Blind Prospective Randomized Controlled Trial of Dopamine Versus Epinephrine as First-Line Vasoactive Drugs in Pediatric Septic Shock. *Critical care medicine* 2015; **43**(11): 2292-302.
90. Chopra A, Kumar V, Dutta A. Hypertonic versus normal saline as initial fluid bolus in pediatric septic shock. *Indian journal of pediatrics* 2011; **78**(7): 833-7.
91. Yildizdas D, Yapicioglu H, Celik U, Sertdemir Y, Alhan E. Terlipressin as a rescue therapy for catecholamine-resistant septic shock in children. *Intensive care medicine* 2008; **34**(3): 511-7.
92. Santhanam I, Sangareddi S, Venkataraman S, Kisson N, Thiruvengadamudayan V, Kasthuri KR. A prospective randomized controlled study of two fluid regimens in the initial management of septic shock in the emergency department. *Pediatric emergency care* 2008; **24**(10): 647-55.
93. Upadhyay M, Singhi S, Murlidharan J, Kaur N, Majumdar S. Randomized evaluation of fluid resuscitation with crystalloid (saline) and colloid (polymer from degraded gelatin in saline) in pediatric septic shock. *Indian Pediatr* 2005; **42**(3): 223-31.
94. Naveda OE, Naveda AF. Positive fluid balance and high mortality in paediatric patients with severe sepsis and septic shock. *Pediatrics* 2016; **49**(3): 71-7.
95. Wu JR, Chen IC, Dai ZK, Hung JF, Hsu JH. Early Elevated B-Type Natriuretic Peptide Levels are Associated with Cardiac Dysfunction and Poor Clinical Outcome in Pediatric Septic Patients. *Acta Cardiologica Sinica* 2015; **31**(6): 485-93.
96. Bustos B R, Padilla P O. Predictive value of procalcitonin in children with suspected sepsis. *Revista chilena de pediatria* 2015; **86**(5): 331-6.

97. Cui Y, Zhang Y, Rang Q, Xu L, Zhu Y, Ren Y. A comparison of high versus standard-volume hemofiltration in critically ill children with severe sepsis. *National Medical Journal of China* 2015; **95**(5): 353-8.
98. Chen R, Zhang Y, Cui Y, Miao H, Xu L, Rong Q. Central venous-to-arterial carbon dioxide difference in critically ill pediatric patients with septic shock. *Zhonghua er ke za zhi = Chinese journal of pediatrics* 2014; **52**(12): 918-22.
99. Ibrahim SK, Galal YS, Youssef MRL, Sedrak AS, El Khateeb EM, Abdel-Hameed ND. Prognostic markers among Egyptian children with sepsis in the Intensive Care Units, Cairo University Hospitals. *Allergologia et immunopathologia* 2016; **44**(1): 46-53.
100. Li L, Gong H, Wang Y, et al. A multicenter prospective clinical study on continuous blood purification in treating childhood severe sepsis. *Zhonghua er ke za zhi = Chinese journal of pediatrics* 2014; **52**(6): 438-43.
101. Manzoli TF, Troster EJ, Ferranti JF, Sales MM. Prolonged suppression of monocytic human leukocyte antigen-DR expression correlates with mortality in pediatric septic patients in a pediatric tertiary Intensive Care Unit. *Journal of critical care* 2016; **33**: 84-9.
102. Rady H, Hafez M, Bazaraa H, Aly Y. Adrenocortical status in infants and children with sepsis and septic shock. *Pediatric Critical Care Medicine* 2014; **15**(4): 185.
103. Ranjit S, Natraj R, Kandath SK, Kissoon N, Ramakrishnan B, Marik PE. Early norepinephrine decreases fluid and ventilatory requirements in pediatric vasodilatory septic shock. *Indian Journal of Critical Care Medicine* 2016; **20**(10): 561-9.
104. Samransamruajkit R, Nakornchai K, Pongsanon K, Deerojanawong J, Sritippayawan S, Prapphal N. Interleukin-10 polymorphisms and clinical risk factors in children with severe sepsis and septic shock. *Critical Care and Shock* 2014; **17**(2): 50-7.
105. Yuan YH, Xiao ZH, Zhang H, et al. Impact of continuous blood purification on T cell subsets in children with severe sepsis. *Chinese Journal of Contemporary Pediatrics* 2014; **16**(2): 194-7.
106. Chen J, Li XZ, Bai ZJ, et al. Association of Fluid Accumulation with Clinical Outcomes in Critically Ill Children with Severe Sepsis. *PloS one* 2016; **11**(7).
107. Phumeetham S, Chat-Uthai N, Manavathongchai M, Viprakasit V. Genetic association study of tumor necrosis factor-alpha with sepsis and septic shock in Thai pediatric patients. *Jornal de pediatria* 2012; **88**(5): 417-22.
108. Jat KR, Jhamb U, Gupta VK. Serum lactate levels as the predictor of outcome in pediatric septic shock. *Indian Journal of Critical Care Medicine* 2011; **15**(2): 102-7.
109. Raj S, Killinger JS, Gonzalez JA, Lopez L. Myocardial dysfunction in pediatric septic shock. *The Journal of pediatrics* 2014; **164**(1): 72-7.e2.
110. Sankar J, Sankar MJ, Suresh CP, Dubey NK, Singh A. Early goal-directed therapy in pediatric septic shock: Comparison of outcomes "with" and "without" intermittent superior venacaval oxygen saturation monitoring: A prospective cohort study. *Pediatric Critical Care Medicine* 2014; **15**(4): e157-e67.
111. Sankar J, Das RR, Dewangan S, et al. Prevalence and outcome of diastolic dysfunction in children with fluid refractory septic shock- A prospective observational study. *Pediatric Critical Care Medicine* 2014; **15**(4): 127.
112. Karim F, Adil SN, Afaq B, Ul Haq A. Deficiency of ADAMTS-13 in pediatric patients with severe sepsis and impact on in-hospital mortality. *BMC pediatrics* 2013; **13**: 44.
113. Ranjit S, Aram G, Kissoon N, et al. Multimodal monitoring for hemodynamic categorization and management of pediatric septic shock: a pilot observational study\*. *Pediatr Crit Care Med* 2014; **15**(1): e17-26.
114. Samransamruajkit R, Uppala R, Pongsanon K, Deelodejanawong J, Sritippayawan S, Prapphal N. Clinical outcomes after utilizing surviving sepsis campaign in children with septic shock and prognostic value of initial plasma NT-proBNP. *Indian Journal of Critical Care Medicine* 2014; **18**(2): 70-6.
115. Cartaya JM, Rovira LE, Segredo Y, Alvarez I, Acevedo Y, Moya A. Implementing ACCM critical care guidelines for septic shock management in a Cuban pediatric intensive care unit. *MEDICC review* 2014; **16**(3-4): 47-54.
116. Xu XJ, Tang YM, Song H, et al. A multiplex cytokine score for the prediction of disease severity in pediatric hematology/oncology patients with septic shock. *Cytokine* 2013; **64**(2): 590-6.
117. Carmona F, Manso PH, Silveira VS, Cunha FQ, de Castro M, Carlotti A. Inflammation, Myocardial Dysfunction, and Mortality in Children With Septic Shock: An Observational Study. *Pediatric cardiology* 2014; **35**(3): 463-70.
118. Oliveira NS, Silva VR, Castelo JS, Elias-Neto J, Pereira FE, Carvalho WB. Serum level of cardiac troponin I in pediatric patients with sepsis or septic shock. *Pediatric critical care medicine : a journal of the Society of Critical Care Medicine and the World Federation of Pediatric Intensive and Critical Care Societies* 2008; **9**(4): 414-7.

119. Santolaya ME, Alvarez AM, Aviles CL, et al. Predictors of severe sepsis not clinically apparent during the first twenty-four hours of hospitalization in children with cancer, neutropenia, and fever: a prospective, multicenter trial. *Pediatr Infect Dis J* 2008; **27**(6): 538-43.
120. Lodha R, Vivekanandhan S, Sarthi M, Arun S, Kabra SK. Thyroid function in children with sepsis and septic shock. *Acta Paediatrica* 2007; **96**(3): 406-9.
121. Onenli-Mungan N, Yildizdas D, Yapicioglu H, Topaloglu AK, Yuksel B, Ozer G. Growth hormone and insulin-like growth factor 1 levels and their relation to survival in children with bacterial sepsis and septic shock. *Journal of paediatrics and child health* 2004; **40**(4): 221-6.
122. Pancera CF, Costa CM, Hayashi M, Lamelas RG, Camargo B. Severe sepsis and septic shock in children with cancer. *Revista da Associacao Medica Brasileira (1992)* 2004; **50**(4): 439-43.
123. Samransamruajkit R, Hiranrat T, Prapphal N, Sritippayawan S, Deerojanawong J, Poovorawan Y. Levels of protein C activity and clinical factors in early phase of pediatric septic shock may be associated with the risk of death. *Shock (Augusta, Ga)* 2007; **28**(5): 518-23.
124. Sarthi M, Lodha R, Vivekanandhan S, Arora NK. Adrenal status in children with septic shock using low-dose stimulation test. *Pediatric critical care medicine : a journal of the Society of Critical Care Medicine and the World Federation of Pediatric Intensive and Critical Care Societies* 2007; **8**(1): 23-8.
125. Casartelli C, Garcia PCR, Branco RG, Piva JP, Einloft PR, Tasker RC. Adrenal response in children with septic shock. *Intensive care medicine* 2007; **33**(9): 1609-13.
126. Branco RG, Garcia PC, Piva JP, Casartelli CH, Seibel V, Tasker RC. Glucose level and risk of mortality in pediatric septic shock. *Pediatric critical care medicine : a journal of the Society of Critical Care Medicine and the World Federation of Pediatric Intensive and Critical Care Societies* 2005; **6**(4): 470-2.
127. Pizarro CF, Troster EJ, Damiani D, Carcillo JA. Absolute and relative adrenal insufficiency in children with septic shock. *Critical care medicine* 2005; **33**(4): 855-9.
128. Singh D, Chopra A, Pooni PA, Bhatia RC. A clinical profile of shock in children in Punjab, India. *Indian pediatrics* 2006; **43**(7): 619-23.
129. Goh A, Lum L. Sepsis, severe sepsis and septic shock in paediatric multiple organ dysfunction syndrome. *Journal of paediatrics and child health* 1999; **35**(5): 488-92.
130. Lin JJ, Chan OW, Hsiao HJ, Wang Y, Hsia SH, Chiu CH. Decreased ADAMTS 13 Activity is Associated With Disease Severity and Outcome in Pediatric Severe Sepsis. *Medicine* 2016; **95**(16): e3374.
131. Bagci S, Horoz OO, Yildizdas D, Reinsberg J, Bartmann P, Muller A. Melatonin status in pediatric intensive care patients with sepsis. *Pediatric critical care medicine : a journal of the Society of Critical Care Medicine and the World Federation of Pediatric Intensive and Critical Care Societies* 2012; **13**(2): e120-3.
132. de Oliveira CF, de Oliveira DS, Gottschald AF, et al. ACCM/PALS haemodynamic support guidelines for paediatric septic shock: an outcomes comparison with and without monitoring central venous oxygen saturation. *Intensive care medicine* 2008; **34**(6): 1065-75.
133. Lodha R, Vivekanandhan S, Sarthi M, Kabra SK. Serial circulating vasopressin levels in children with septic shock. *Pediatric Critical Care Medicine* 2006; **7**(3): 220-4.
134. Leteurtre S, Leclerc F, Martinot A, et al. Can generic scores (Pediatric Risk of Mortality and Pediatric Index of Mortality) replace specific scores in predicting the outcome of presumed meningococcal septic shock in children? *Critical care medicine* 2001; **29**(6): 1239-46.
